# Supplementary material for: RdxA-independent mechanism of Helicobacter pylori metronidazole metabolism
Source: Front Microbiol. 2025 Mar 26;16:1553734. doi: 10.3389/fmicb.2025.1553734 (PMC11979234; doi:10.3389/fmicb.2025.1553734)
Supplement: Supplementary file 1 [file Table_1.xlsx]

## Sheet: S1
Identification of differentially expressed genes between ICDC15003s and ICDC15003-50-1.
gene_id	log2FoldChange	pvalue	padj	gene_description
697610AGL000129	-3.51085	2.77683e-75	1.0066e-72	ABC transporter substrate-binding protein
697610AGL001295	-1.94377	1.43772e-66	2.97813e-64	outer membrane beta-barrel protein HofH
697610AGL001072	-1.68108	6.34995e-18	1.73725e-16	Sua5 YciO YrdC YwlC family protein
697610AGL000738	-1.59316	8.55488e-07	5.08385e-06	ferrous iron transport protein A
697610AGL001303	-1.59049	2.89017e-46	3.49229e-44	sugar MFS transporter
697610AGL000201	-1.58597	6.767e-08	4.69481e-07	Conjugal transfer protein
697610AGL001412	-1.52845	1.46084e-45	1.6294e-43	nicotinamide riboside transporter PnuC
697610AGL001026	-1.50925	1.3572e-49	1.96794e-47	CDP-diacylglycerol pyrophosphatase
697610AGL000476	-1.47401	2.69582e-42	2.7921e-40	Polysaccharide deacetylase
697610AGL000478	-1.44115	1.08804e-49	1.75295e-47	GTP-binding protein
697610AGL001411	-1.43288	2.87597e-10	2.76169e-09	thiamine diphosphokinase
697610AGL000416	-1.40451	1.83278e-17	4.83186e-16	ABC transporter ATP-binding protein
697610AGL000202	-1.35225	4.66138e-08	3.31324e-07	TrbI/VirB10 family protein
697610AGL001015	-1.25222	0.000731146	0.00238775	D-glycero-beta-D-manno-heptose 1,7-bisphosphate 7-phosphatase
697610AGL000029	-1.25054	1.80062e-13	2.74832e-12	Methyltransferase small domain
697610AGL000737	-1.24528	1.72128e-09	1.5312e-08	endonuclease III
697610AGL000876	-1.24344	1.46179e-20	5.04667e-19	adhesin SabA
697610AGL001089	-1.23455	5.706e-08	4.01636e-07	membrane protein
697610AGL000043	-1.18836	6.76367e-15	1.34347e-13	Phosphate transporter family
697610AGL000571	-1.18399	1.18854e-34	7.83357e-33	acetate--CoA ligase
697610AGL000200	-1.17702	2.26122e-15	4.68396e-14	VirB8 protein
697610AGL000573	-1.17542	4.97447e-32	3.00541e-30	response regulator-like transcription factor HsrA
697610AGL001095	-1.16584	1.01663e-22	4.33563e-21	Alanine racemase
697610AGL001315	-1.16431	5.50893e-07	3.37045e-06	sugar transporter/Major Facilitator Superfamily
697610AGL000592	-1.13496	8.4604e-12	1.01582e-10	helix-turn-helix transcriptional regulator
697610AGL001304	-1.11111	2.21693e-28	1.23636e-26	Permease family
697610AGL000177	-1.10483	8.1579e-13	1.13011e-11	VirB4 family type IV secretion/conjugal transfer ATPase
697610AGL001463	-1.08977	2.53211e-21	9.54658e-20	efflux RND transporter permease subunit
697610AGL000811	-1.08704	1.00942e-19	3.3265e-18	dehypoxanthine futalosine cyclase
697610AGL000403	-1.07355	4.20371e-12	5.30033e-11	hydroxymethylbilane synthase
697610AGL000655	-1.07053	1.13196e-13	1.78407e-12	NUDIX domain
697610AGL000208	-1.05244	2.12713e-05	9.72978e-05	hydrogenase expression/formation protein HypE
697610AGL000810	-1.02664	1.78894e-26	8.94468e-25	outer membrane protein assembly factor BamA
697610AGL000343	-1.01525	2.39435e-13	3.50688e-12	pseudaminic acid synthase
697610AGL000736	-1.00054	5.5387e-12	6.80602e-11	flagellar motor switch protein FliN
697610AGL001441	1.00218	3.9958e-14	6.81636e-13	Ribosomal protein L5
697610AGL001433	1.02359	1.13343e-05	5.60912e-05	translation initiation factor IF-1
697610AGL000311	1.0239	1.68853e-05	7.97516e-05	cytochrome c oxidase, cbb3-type, CcoQ subunit
697610AGL001355	1.02793	4.02099e-05	0.00017301	CrcB-like protein, Camphor Resistance (CrcB)
697610AGL000809	1.02946	3.67398e-11	4.06662e-10	Radical SAM superfamily
697610AGL001473	1.04775	5.92497e-15	1.19322e-13	TonB system transport protein ExbD
697610AGL001053	1.06182	5.95912e-22	2.46878e-20	hydrogenase nickel incorporation protein HypB
697610AGL000248	1.06224	1.84253e-07	1.18741e-06	Ribosomal protein L13
697610AGL001060	1.06558	3.95662e-05	0.000170976	Flagellar hook-length control protein FliK
697610AGL000069	1.07607	0.00287641	0.0081144	Permease MlaE
697610AGL000487	1.08365	6.06485e-27	3.14073e-25	Pyridoxamine 5'-phosphate oxidase
697610AGL000007	1.08837	0.00369658	0.0101902	DNA methylase
697610AGL001440	1.09707	1.18909e-15	2.69403e-14	Ribosomal protein S8
697610AGL000037	1.10788	2.12571e-06	1.19933e-05	Peptidyl-tRNA hydrolase
697610AGL001388	1.12361	9.33905e-08	6.38756e-07	Ribosome recycling factor
697610AGL001517	1.12916	0.00241475	0.00697489	DNA/RNA non-specific endonuclease
697610AGL000247	1.15331	2.65843e-09	2.29448e-08	Ribosomal protein S9
697610AGL001233	1.16587	6.12054e-11	6.39829e-10	Pyruvate ferredoxin/flavodoxin oxidoreductase
697610AGL000600	1.17738	6.56988e-19	1.98465e-17	amino acid permease
697610AGL000745	1.18972	7.04433e-06	3.62209e-05	Haloacid dehalogenase-like hydrolase
697610AGL000313	1.21455	8.47681e-12	1.01582e-10	DUF4006 family protein
697610AGL000376	1.22283	3.28665e-08	2.38282e-07	succinyl-diaminopimelate desuccinylase
697610AGL001294	1.24114	4.85932e-10	4.5141e-09	glucose-6-phosphate isomerase
697610AGL001353	1.24594	1.89301e-14	3.47451e-13	Rhodanese-like domain
697610AGL000662	1.25174	3.51804e-12	4.5143e-11	type IV secretion system chaperone CagF
697610AGL001416	1.2597	2.25957e-19	7.12257e-18	polyisoprenoid-binding protein
697610AGL001526	1.27942	6.92794e-15	1.3575e-13	DUF262 domain-containing protein
697610AGL001447	1.28578	3.83334e-17	9.26391e-16	Ribosomal protein S3
697610AGL000784	1.29435	7.60064e-25	3.67364e-23	Flavodoxin-like fold/NAD(P)H-dependent oxidoreductase
697610AGL001444	1.30326	3.90644e-14	6.74326e-13	30S ribosomal protein S17
697610AGL000717	1.30603	1.0437e-35	7.20649e-34	DUF417 domain-containing protein
697610AGL000463	1.31357	1.20253e-05	5.89077e-05	50S ribosomal protein L27
697610AGL001448	1.32168	1.77214e-13	2.73362e-12	Ribosomal protein L22p
697610AGL000640	1.37376	6.20286e-17	1.47445e-15	neuraminyllactose-binding hemagglutinin
697610AGL001514	1.3859	1.8494e-15	3.98011e-14	outer membrane protein assembly factor BamD
697610AGL000907	1.4091	0.00203094	0.00603454	Flagellar protein FliS
697610AGL001369	1.42684	7.63073e-23	3.3529e-21	Carbon-nitrogen hydrolase/formamidase
697610AGL000150	1.43022	1.825e-21	7.15203e-20	Pyridoxal phosphate biosynthesis protein PdxJ
697610AGL000953	1.43064	0.00105483	0.00335419	MoaE protein
697610AGL001445	1.4355	2.10934e-13	3.18598e-12	50S ribosomal protein L29
697610AGL001451	1.44427	1.01193e-14	1.94111e-13	50S ribosomal protein L23
697610AGL000839	1.45384	2.5677e-21	9.54658e-20	ferrous iron transport protein B
697610AGL001210	1.45879	0.00204083	0.00605155	restriction endonuclease
697610AGL000038	1.47161	2.90003e-36	2.10252e-34	Ribosomal protein TL5
697610AGL000930	1.5157	2.97012e-08	2.18613e-07	MULTISPECIES: DNA-directed RNA polymerase subunit omega
697610AGL001251	1.57184	3.33282e-39	2.8427e-37	OmpA family omp18
697610AGL000386	1.57234	2.65661e-28	1.4267e-26	iron-sulfur cluster assembly scaffold protein NifU
697610AGL000537	1.63175	5.57462e-05	0.000232276	AAA family ATPase
697610AGL001449	1.64951	3.08878e-21	1.11968e-19	30S ribosomal protein S19
697610AGL001450	1.69815	7.0993e-37	5.41789e-35	Ribosomal Proteins L2
697610AGL000653	1.75863	0.00277198	0.00791214	R.Pab1 restriction endonuclease
697610AGL001452	1.78641	3.28775e-37	2.64847e-35	Ribosomal protein L4
697610AGL001201	1.83019	3.15805e-11	3.54975e-10	Thioredoxin-like domain
697610AGL001454	1.86978	3.49159e-17	8.58102e-16	Ribosomal protein S10p
697610AGL001453	2.06691	8.34042e-40	8.0624e-38	Ribosomal protein L3
697610AGL000838	2.12953	9.04187e-47	1.19188e-44	TonB-dependent Receptor Plug Domain
697610AGL000460	2.48106	2.90254e-106	4.20869e-103	Carbon-nitrogen hydrolase
697610AGL001031	2.52058	1.79572e-98	1.3019e-95	TonB dependent receptor
697610AGL000462	2.84357	6.08362e-06	3.1961e-05	Ribosomal prokaryotic L21

## Sheet: S2
Identification of differentially expressed genes between ICDC15003s and ICDC15003-50-2 (MNZ r0) .
gene_id	log2FoldChange	pvalue	padj	gene_description
697610AGL001031	4.27791	9.47764e-208	1.397e-204	TonB-dependent Receptor
697610AGL000150	2.98428	4.27791e-66	3.15282e-63	Pyridoxal phosphate biosynthesis protein PdxJ
697610AGL000838	3.06316	1.15289e-63	5.66451e-61	TonB-dependent Receptor Plug Domain
697610AGL000151	2.52233	8.19493e-51	3.01983e-48	Pyridoxal phosphate biosynthetic protein PdxA
697610AGL000873	2.43669	1.74956e-41	5.15769e-39	Helicobacter outer membrane protein
697610AGL000796	-1.88341	4.99061e-37	1.05088e-34	NAD(P)-dependent oxidoreductase
697610AGL000460	2.19851	2.16505e-33	3.98911e-31	Carbon-nitrogen hydrolase
697610AGL000233	-1.46781	4.84427e-31	7.14045e-29	AmiS/UreI family transporter
697610AGL000132	-1.7731	2.41856e-29	3.24087e-27	NLPA lipoprotein
697610AGL000157	1.37065	4.17975e-27	4.7392e-25	DUF3944 domain-containing protein
697610AGL000229	-1.55055	6.22895e-25	5.73842e-23	UreD urease accessory protein
697610AGL000194	-1.52082	2.20542e-22	1.806e-20	AAA domain-containing protein
697610AGL000797	-2.03934	2.81015e-22	2.18008e-20	Nitroreductase family(NADPH-flavin oxidoreductase)
697610AGL000590	1.77286	8.72879e-20	6.43312e-18	ferric iron uptake transcriptional regulator
697610AGL000389	1.24699	2.47782e-19	1.73919e-17	peptide-methionine (R)-S-oxide reductase MsrB
697610AGL000085	1.4901	3.20591e-19	2.07068e-17	Type III restriction enzyme
697610AGL000744	-1.22345	3.23105e-19	2.07068e-17	Pyruvate ferredoxin/flavodoxin oxidoreductase
697610AGL000826	1.49071	3.48361e-19	2.13952e-17	pyridoxal phosphate-dependent aminotransferase
697610AGL001325	-1.12702	4.02384e-18	2.28121e-16	elongation factor G
697610AGL001021	1.42361	1.83478e-17	1.00166e-15	transcription elongation factor GreA
697610AGL001303	1.33987	2.36765e-17	1.2464e-15	sugar MFS transporter
697610AGL000832	1.4331	8.40009e-17	4.12724e-15	Gfo/Idh/MocA family oxidoreductase
697610AGL000131	-1.41553	9.43143e-17	4.48449e-15	C-terminal domain of 1-Cys peroxiredoxin
697610AGL001428	-1.24174	1.79388e-16	8.26304e-15	DNA-directed RNA polymerase subunit alpha
697610AGL001478	1.22608	2.62175e-15	1.04445e-13	Phosphoglycerate kinase
697610AGL000230	-1.39587	4.29738e-15	1.62419e-13	urease accessory protein UreG
697610AGL000991	1.42122	4.49659e-15	1.65699e-13	spermidine synthase
697610AGL001251	1.60898	1.59068e-14	5.58251e-13	OmpA family omp18
697610AGL000465	-1.27389	9.77373e-14	3.20144e-12	ABC transporter permease
697610AGL001435	-1.15269	1.14669e-13	3.67439e-12	SecY translocase
697610AGL000876	1.57533	1.48039e-13	4.64276e-12	adhesin SabA
697610AGL000869	1.06061	1.86029e-13	5.71263e-12	DNA polymerase III subunit gamma/tau
697610AGL001412	1.01053	2.99822e-13	9.01915e-12	nicotinamide riboside transporter PnuC
697610AGL000840	1.1773	3.21193e-13	9.46877e-12	3'-5' exonuclease
697610AGL000466	-1.02048	6.44761e-13	1.86348e-11	ABC transporter permease
697610AGL000089	1.12527	9.09476e-13	2.52937e-11	Arginase family
697610AGL001447	-1.36388	5.04698e-12	1.35259e-10	Ribosomal protein S3
697610AGL000867	1.3029	1.34141e-11	3.53078e-10	LPS export ABC transporter ATP-binding protein
697610AGL000809	1.35054	1.39497e-11	3.60733e-10	Radical SAM superfamily
697610AGL000743	-1.01065	2.13334e-11	5.32973e-10	2-oxoglutarate ferredoxin oxidoreductase subunit beta
697610AGL000171	1.25343	2.78022e-11	6.55907e-10	co-chaperone GroES
697610AGL000470	-1.27682	1.21713e-10	2.60006e-09	Alginate lyase
697610AGL001415	1.28461	1.70716e-10	3.49495e-09	thiaminase II
697610AGL001411	1.32048	1.81021e-10	3.55766e-09	thiamine diphosphokinase
697610AGL000232	-1.00375	1.98076e-10	3.79173e-09	urease accessory protein UreE
697610AGL001187	-1.21423	2.28263e-10	4.31358e-09	Redoxin thiol peroxidase
697610AGL001404	-1.07212	2.60252e-10	4.85584e-09	NADH-quinone oxidoreductase subunit M
697610AGL000675	1.54993	4.62858e-10	8.52815e-09	type IV secretion system apparatus protein CagX
697610AGL001353	1.67818	4.84729e-10	8.82088e-09	rhodanese-like domain-containing protein
697610AGL001434	-1.09427	5.8038e-10	1.04327e-08	type I methionyl aminopeptidase
697610AGL001184	1.01329	1.88846e-09	3.19953e-08	chemotaxis protein CheV
697610AGL000417	-1.08269	2.14264e-09	3.58892e-08	integral membrane protein of the oligopeptide transport system
697610AGL000467	-1.13631	2.7206e-09	4.45574e-08	ABC transporter ATP-binding protein
697610AGL000558	1.25458	3.55462e-09	5.69513e-08	3-methyl-2-oxobutanoate hydroxymethyltransferase
697610AGL001401	-1.1018	4.96416e-09	7.78423e-08	NADH-ubiquinone/plastoquinone oxidoreductase chain 6
697610AGL000109	1.64661	7.91119e-09	1.2147e-07	M23 family metallopeptidase
697610AGL000152	1.82744	1.15485e-08	1.73698e-07	tRNA (adenosine(37)-N6)-threonylcarbamoyltransferase complex transferase subunit TsaD
697610AGL001399	-1.00963	1.3149e-08	1.95774e-07	NADH-quinone oxidoreductase subunit NuoH
697610AGL000386	1.02851	2.34356e-08	3.28991e-07	iron-sulfur cluster assembly scaffold protein NifU
697610AGL001448	-1.47073	2.45554e-08	3.41459e-07	Ribosomal protein L22p
697610AGL000571	-1.1139	2.55867e-08	3.52475e-07	acetate--CoA ligase
697610AGL001450	-1.20063	4.32841e-08	5.6965e-07	Ribosomal Proteins L2
697610AGL001113	1.20554	1.03025e-07	1.27613e-06	C4-type zinc ribbon domain
697610AGL000912	-1.10269	2.26891e-07	2.63337e-06	Na+/H+ antiporter family
697610AGL000905	1.08925	2.51248e-07	2.87085e-06	flagellar protein FlaG
697610AGL001269	1.16744	3.61354e-07	4.00477e-06	DUF2130 domain-containing protein
697610AGL001276	-1.42641	4.04494e-07	4.44944e-06	tRNA (guanosine(37)-N1)-methyltransferase TrmD
697610AGL000320	1.05365	6.73646e-07	6.99264e-06	phosphopyruvate hydratase
697610AGL001508	-1.11638	7.04499e-07	7.26176e-06	MreB/Mbl protein
697610AGL001375	-4.14828	7.61916e-07	7.69222e-06	outer membrane protein
697610AGL001020	1.14434	8.29988e-07	8.26269e-06	dUTP diphosphatase
697610AGL000998	-1.04116	1.94404e-06	1.81361e-05	UDP-GlcNAc C6 dehydratase
697610AGL001049	-2.60346	4.02932e-06	3.57784e-05	outer membrane protein
697610AGL001569	-1.40963	4.30908e-06	3.7807e-05	YidC periplasmic domain
697610AGL000610	1.29408	7.9565e-06	6.62592e-05	SAM-dependent DNA methyltransferase
697610AGL001233	1.0148	8.42666e-06	6.93905e-05	pyruvate flavodoxin oxidoreductase subunit gamma
697610AGL001060	1.43054	1.40163e-05	0.000110481	flagellar hook-length control protein FliK
697610AGL001451	-1.43074	1.61042e-05	0.000125596	50S ribosomal protein L23
697610AGL000073	-1.22652	3.57587e-05	0.000264866	flagellar motility protein
697610AGL001465	-1.29355	6.95537e-05	0.000472453	azaleucine resistance protein AzlC
697610AGL000640	-1.03227	7.58044e-05	0.000510209	neuraminyllactose-binding hemagglutinin
697610AGL001402	-1.06137	7.72524e-05	0.000515249	NADH-quinone oxidoreductase subunit NuoK
697610AGL000513	-1.03446	0.00010587	0.000683682	flagellar basal body M-ring protein FliF
697610AGL001058	-1.82205	0.000300883	0.00146009	phosphate acetyltransferase
697610AGL001268	1.15908	0.000304665	0.0016673	AAA family ATPase
697610AGL001092	1.48839	0.000329927	0.00180116	DUF262 domain-containing protein
697610AGL000932	1.33647	0.000399727	0.00213247	menaquinone biosynthesis protein
697610AGL000290	-1.36161	0.000400743	0.00213247	50S ribosomal protein L20
697610AGL000239	1.18533	0.000405237	0.00214258	Ribosomal protein S20
697610AGL001222	1.14442	0.000433091	0.00227991	bifunctional 4-hydroxy-2-oxoglutarate aldolase/2-dehydro-3-deoxy-phosphogluconate aldolase
697610AGL000894	1.02362	0.000512193	0.00263976	histidine triad domain protein
697610AGL000518	1.67833	0.000550821	0.00279007	DNA (cytosine-5-)-methyltransferase
697610AGL001194	1.6413	0.000559582	0.0028151	Sporulation related domain
697610AGL001046	1.07513	0.000632713	0.00314013	type II toxin-antitoxin system mRNA interferase toxin, RelE/StbE family
697610AGL001430	-1.01995	0.00082422	0.00393171	30S ribosomal protein S11
697610AGL000007	2.23769	0.00126596	0.0057416	site-specific DNA-methyltransferase
697610AGL001422	1.81396	0.00133203	0.0060043	bifunctional indole-3-glycerol-phosphate synthase TrpC
697610AGL000745	1.11084	0.00177535	0.00769667	HAD-IA family hydrolase
697610AGL000960	1.56965	0.00193012	0.0081753	M48 family metallopeptidase
697610AGL000537	1.62518	0.00224047	0.00922475	AAA family ATPase
697610AGL001536	-1.62406	0.00237824	0.00963057	MULTISPECIES: flagellar biosynthesis protein FliQ
697610AGL000726	-1.37021	0.00462298	0.0167839	ribose 5-phosphate isomerase B
697610AGL001274	-1.02607	0.00473447	0.017021	NYN domain-containing protein
697610AGL001568	-1.13018	0.00606714	0.0207976	membrane protein insertion efficiency factor YidD
697610AGL000416	-2.49845	0.00630574	0.0215653	ABC transporter ATP-binding protein
697610AGL001461	1.32197	0.00904476	0.0293656	copper resistance outer membrane protein CrdB
697610AGL000213	1.27173	0.0124034	0.0386525	restriction endonuclease
697610AGL000643	1.28525	0.0130874	0.0403574	DUF493 domain-containing protein
697610AGL000570	-1.02054	0.0151233	0.0452708	ribosome maturation factor RimP
697610AGL000907	1.55019	0.0161741	0.0481454	flagellar export chaperone FliS

## Sheet: S3
Identification of differentially expressed genes between ICDC15003s and ICDC15003-50-2 (MNZ r50) .
gene_id	log2FoldChange	pvalue	padj	gene_description
697610AGL000460	3.87906	2.67423e-216	4.17714e-213	Carbon-nitrogen hydrolase
697610AGL001031	4.87896	1.52584e-208	1.19168e-205	TonB-dependent Receptor
697610AGL000150	3.60996	1.56194e-137	8.13252e-135	Pyridoxal phosphate biosynthesis protein PdxJ
697610AGL000838	3.79929	7.34719e-94	1.91272e-91	TonB-dependent Receptor Plug Domain
697610AGL000151	2.55359	2.89523e-78	6.4605e-76	Pyridoxal phosphate biosynthetic protein PdxA
697610AGL000826	2.17235	2.5938e-75	5.06439e-73	pyridoxal phosphate-dependent aminotransferase
697610AGL001021	2.15715	5.46497e-65	8.53628e-63	transcription elongation factor GreA
697610AGL000832	2.10732	5.76116e-63	8.18085e-61	Gfo/Idh/MocA family oxidoreductase
697610AGL000416	-4.35735	2.30198e-53	2.39713e-51	ABC transporter ATP-binding protein
697610AGL000157	1.76243	1.09619e-51	1.07016e-49	DUF3944 domain-containing protein
697610AGL000085	2.06664	9.75541e-50	8.9635e-48	Type III restriction enzyme
697610AGL000590	2.46624	6.93476e-47	5.7011e-45	ferric iron uptake transcriptional regulator
697610AGL000809	2.17556	3.92509e-46	3.0655e-44	Radical SAM superfamily
697610AGL000796	-1.8938	4.21948e-44	3.13849e-42	NAD(P)-dependent oxidoreductase
697610AGL000194	-1.81088	2.3564e-42	1.6003e-40	AAA domain-containing protein
697610AGL001478	1.69654	2.79624e-41	1.81989e-39	Phosphoglycerate kinase
697610AGL001251	2.08612	3.62855e-37	2.02421e-35	OmpA family omp18
697610AGL000991	1.81815	4.23446e-34	2.28077e-32	spermidine synthase
697610AGL000873	1.87643	1.37852e-32	7.17751e-31	Helicobacter outer membrane protein
697610AGL000471	1.58121	5.28544e-32	2.66318e-30	polyisoprenoid-binding protein
697610AGL000389	1.26341	1.24902e-31	6.09678e-30	peptide-methionine (R)-S-oxide reductase MsrB
697610AGL001472	1.44565	7.43731e-31	3.41679e-29	TonB-system energizer ExbB
697610AGL001514	1.66929	2.36466e-30	1.026e-28	outer membrane protein assembly factor BamD
697610AGL001547	-1.44536	1.84791e-29	7.80117e-28	ribonuclease J
697610AGL000949	-1.43709	7.9852e-29	3.04217e-27	Helicobacter outer membrane protein
697610AGL001178	-1.17166	3.26781e-27	1.21531e-25	30S ribosomal protein S1
697610AGL001353	1.96174	1.94914e-25	6.47777e-24	Rhodanese-like domain
697610AGL000573	-1.16475	2.69916e-25	8.78353e-24	nse regulator-like transcription factor HsrA
697610AGL001473	1.4863	3.05994e-25	9.75434e-24	TonB system transport protein ExbD
697610AGL001113	1.49839	1.02821e-24	3.21212e-23	C4-type zinc ribbon domain
697610AGL001415	1.4472	2.02469e-23	6.08186e-22	thiaminase II
697610AGL000475	1.30417	6.39169e-23	1.88374e-21	Carbon-nitrogen hydrolase
697610AGL001369	1.40948	1.17912e-21	3.28892e-20	Carbon-nitrogen hydrolase
697610AGL000840	1.16039	2.88416e-21	7.90362e-20	3'-5' exonuclease
697610AGL000171	1.16753	3.94817e-21	1.06328e-19	co-chaperone GroES
697610AGL000162	1.65413	7.22716e-21	1.88147e-19	3-deoxy-8-phosphooctulonate synthase
697610AGL000905	1.54348	2.08202e-19	4.92745e-18	FlaG protein
697610AGL001243	1.03341	2.60696e-19	5.90156e-18	Gamma-glutamyltranspeptidase
697610AGL000797	-1.5855	3.68076e-19	8.09066e-18	Nitroreductase family(NADPH-flavin oxidoreductase)
697610AGL000941	1.51644	3.72937e-19	8.09066e-18	outer membrane beta-barrel protein HofF
697610AGL001344	-1.19544	5.17094e-19	1.10644e-17	polyribonucleotide nucleotidyltransferase
697610AGL000744	-1.28708	5.15602e-18	1.07383e-16	Pyruvate ferredoxin/flavodoxin oxidoreductase
697610AGL000229	-1.25746	5.51412e-18	1.1333e-16	UreD urease accessory protein
697610AGL000859	-1.1085	5.82383e-18	1.18141e-16	16S rRNA (cytosine(1402)-N(4))-methyltransferase RsmH
697610AGL000195	-1.36328	8.51706e-18	1.68401e-16	Aspartate decarboxylase
697610AGL001548	-1.10497	8.99737e-18	1.75674e-16	Ribosomal RNA adenine dimethylase
697610AGL000089	1.18301	2.13588e-17	4.11882e-16	Arginase family
697610AGL000988	1.07465	5.65107e-17	1.07646e-15	IMP dehydrogenase
697610AGL001268	1.71028	1.625e-16	2.98617e-15	AAA domain
697610AGL000657	-1.46674	1.08992e-15	1.97959e-14	glycolate oxidase subunit GlcD
697610AGL001020	1.38604	1.831e-15	3.28738e-14	dUTP diphosphatase
697610AGL000766	1.54837	3.48126e-15	6.10981e-14	ABC transporter ATP-binding protein
697610AGL000752	-1.00184	4.29982e-15	7.42054e-14	pyridoxal phosphate-dependent aminotransferase family protein
697610AGL000566	-1.08409	6.75919e-15	1.12318e-13	homoserine kinase
697610AGL000197	-1.34065	7.94391e-15	1.30615e-13	PDZ domain-containing protein
697610AGL000417	-1.31332	9.45328e-15	1.53813e-13	N-terminal TM domain of oligopeptide transport permease C
697610AGL000401	1.18852	1.30056e-14	2.09431e-13	Sel1-like repeat protein HcpE
697610AGL000117	1.32149	1.46092e-14	2.32852e-13	preprotein translocase subunit YajC
697610AGL000124	1.02558	1.68714e-14	2.63532e-13	flagellar hook-basal body complex protein FliE
697610AGL000513	-1.32019	2.01357e-14	3.11406e-13	flagellar basal body M-ring protein FliF
697610AGL000810	-1.00409	2.74305e-14	4.20063e-13	outer membrane protein assembly factor BamA
697610AGL000720	-1.61562	2.79183e-14	4.23383e-13	Fe-S oxidoreductase
697610AGL001562	-1.17313	7.10696e-14	1.04727e-12	4-(cytidine 5'-diphospho)-2-C-methyl-D-erythritol kinase
697610AGL000558	1.20978	1.90536e-13	2.74603e-12	3-methyl-2-oxobutanoate hydroxymethyltransferase
697610AGL001184	1.02031	3.60168e-13	4.89202e-12	chemotaxis protein CheV
697610AGL001546	-1.45971	4.90171e-13	6.60041e-12	KpsF/GutQ family sugar-phosphate isomerase
697610AGL000078	1.12697	5.74869e-13	7.60499e-12	penicillin-binding protein activator LpoB
697610AGL000038	1.37714	7.17021e-13	9.25609e-12	Ribosomal protein TL5
697610AGL001025	-1.00956	1.00943e-12	1.2924e-11	flagellar hook protein FlgE
697610AGL000690	-1.13507	1.10151e-12	1.39883e-11	flagellin deglycosylation protein
697610AGL001457	-1.32839	1.2817e-12	1.61452e-11	ribonuclease HII
697610AGL001294	1.66696	2.86744e-12	3.41904e-11	glucose-6-phosphate isomerase
697610AGL000742	-1.07686	4.76187e-12	5.50966e-11	Pyruvate flavodoxin/ferredoxin oxidoreductase, thiamine diP-bdg
697610AGL000994	1.08588	5.7162e-12	6.56522e-11	DNA-binding protein
697610AGL000912	-1.13386	7.00192e-12	7.92537e-11	Na+/H+ antiporter family
697610AGL000152	1.65851	1.33345e-11	1.44264e-10	tRNA (adenosine(37)-N6)-threonylcarbamoyltransferase complex transferase subunit TsaD
697610AGL001269	1.23719	1.3392e-11	1.44264e-10	DUF2130 domain-containing protein
697610AGL000545	-1.03749	2.14437e-11	2.26318e-10	CDP-diacylglycerol--serine O-phosphatidyltransferase
697610AGL000055	-1.25929	2.55759e-11	2.68117e-10	anaphase-promoting protein
697610AGL000210	1.02621	3.53971e-11	3.61374e-10	agmatine deiminase
697610AGL000537	2.41602	4.41442e-11	4.42008e-10	AAA family ATPase
697610AGL000587	-1.33532	5.20112e-11	5.10953e-10	flagellar motor switch protein FliY
697610AGL001233	1.4247	7.53602e-11	7.26621e-10	Pyruvate ferredoxin/flavodoxin oxidoreductase
697610AGL000100	1.12317	9.35978e-11	8.96931e-10	class 1 fructose-bisphosphatase
697610AGL000743	-1.04579	9.75552e-11	9.23522e-10	Thiamine pyrophosphate enzyme
697610AGL000396	1.27302	1.03267e-10	9.71709e-10	3-deoxy-manno-octulosonate cytidylyltransferase
697610AGL000386	1.026	1.86189e-10	1.71576e-09	iron-sulfur cluster assembly scaffold protein NifU
697610AGL001479	1.16278	1.86734e-10	1.71576e-09	type I glyceraldehyde-3-phosphate dehydrogenase
697610AGL000466	-1.03805	2.33423e-10	2.09544e-09	ABC transporter permease
697610AGL001060	1.52171	3.65007e-10	3.18515e-09	Flagellar hook-length control protein FliK
697610AGL001545	-1.2728	6.06308e-10	5.14703e-09	Radical SAM superfamily
697610AGL000998	-1.21737	6.27504e-10	5.29817e-09	UDP-GlcNAc C6 dehydratase
697610AGL000907	2.54126	7.13483e-10	5.95968e-09	Flagellar protein FliS
697610AGL000494	1.00379	2.33511e-09	1.81464e-08	flagellar basal body L-ring protein FlgH
697610AGL001276	-1.35364	2.49436e-09	1.92881e-08	tRNA (guanosine(37)-N1)-methyltransferase TrmD
697610AGL001317	1.19461	3.53433e-09	2.70619e-08	carbonic anhydrase
697610AGL000465	-1.0076	5.50986e-09	4.1179e-08	ABC transporter permease
697610AGL000718	1.00967	5.96233e-09	4.43484e-08	diaminopimelate epimerase
697610AGL000403	-1.09154	8.24376e-09	6.04542e-08	hydroxymethylbilane synthase
697610AGL000864	1.15378	1.075e-08	7.56377e-08	Helicobacter outer membrane protein
697610AGL001388	1.25391	1.20757e-08	8.4584e-08	Ribosome recycling factor
697610AGL000526	-1.11181	2.1344e-08	1.46225e-07	cell division protein FtsK
697610AGL000923	1.92642	3.35426e-08	2.26812e-07	molybdenum cofactor guanylyltransferase MobA
697610AGL001201	1.74629	3.47259e-08	2.33801e-07	thioredoxin fold domain-containing protein
697610AGL001419	1.42839	5.30915e-08	3.48441e-07	anthranilate synthase component I
697610AGL000354	-1.19566	5.34771e-08	3.49503e-07	phospholipase D family protein
697610AGL001341	1.03181	8.84141e-08	5.48027e-07	HNH endonuclease
697610AGL000544	-1.00015	9.17501e-08	5.66457e-07	copper-translocating P-type ATPase CopA
697610AGL001522	-1.05605	1.15468e-07	7.01796e-07	YihY family inner membrane protein
697610AGL000280	-1.12972	1.98744e-07	1.16706e-06	flagellin B
697610AGL001081	1.02902	3.96988e-07	2.23056e-06	zinc metalloprotease HtpX
697610AGL000585	-1.09677	6.87503e-07	3.72875e-06	FliA/WhiG family RNA polymerase sigma factor
697610AGL000346	1.00623	7.43119e-07	3.98884e-06	CvpA family protein
697610AGL000586	-1.2409	1.05478e-06	5.4555e-06	flagellar motor switch protein FliM
697610AGL001004	-1.19185	1.33023e-06	6.78805e-06	Type III restriction enzyme
697610AGL000007	1.68044	1.46647e-06	7.35451e-06	DNA methylase
697610AGL001375	-2.62776	1.46902e-06	7.35451e-06	Helicobacter outer membrane protein
697610AGL000745	1.21042	1.52607e-06	7.61572e-06	Haloacid dehalogenase-like hydrolase
697610AGL001222	1.0396	2.25835e-06	1.09212e-05	bifunctional 4-hydroxy-2-oxoglutarate aldolase/2-dehydro-3-deoxy-phosphogluconate aldolase
697610AGL001058	-1.98676	2.70865e-06	1.29783e-05	phosphate acetyltransferase
697610AGL000198	-1.11533	5.50749e-06	2.58339e-05	P-type conjugative transfer protein TrbL
697610AGL000073	-1.05253	8.685e-06	3.89827e-05	flagellar motility protein
697610AGL000867	1.70597	9.96518e-06	4.39706e-05	LPS export ABC transporter ATP-binding protein
697610AGL000240	-1.15564	1.43878e-05	6.1572e-05	peptide chain release factor 1
697610AGL001049	-1.68625	1.82984e-05	7.62187e-05	Helicobacter outer membrane protein
697610AGL000242	-1.34948	3.65214e-05	0.000143333	Helicobacter outer membrane protein
697610AGL001194	1.52079	4.35159e-05	0.000167832	SPOR domain-containing protein
697610AGL000201	-1.19575	4.68448e-05	0.000179342	Conjugal transfer protein
697610AGL000062	1.24942	5.35657e-05	0.000204072	N-6 DNA Methylase
697610AGL001016	-1.05055	8.95841e-05	0.000329562	sulfite exporter TauE/SafE family protein
697610AGL001082	1.31867	0.000142008	0.000508752	GTP cyclohydrolase I FolE
697610AGL000932	1.1072	0.000157246	0.000557976	menaquinone biosynthesis protein
697610AGL000402	-1.67873	0.000159127	0.000562345	c-type cytochrome
697610AGL000133	-1.02006	0.000197367	0.000680547	Penicillin binding protein 2
697610AGL000966	-1.38525	0.000235144	0.000793293	16S rRNA (guanine(966)-N(2))-methyltransferase RsmD
697610AGL001380	-1.03502	0.000246366	0.00082936	VacB/RNase II family 3'-5' exoribonuclease
697610AGL000701	-1.2777	0.000295855	0.000981159	glutamate racemase
697610AGL000384	-1.19714	0.000331417	0.00108074	helix-turn-helix domain-containing protein
697610AGL000880	-1.75233	0.000473681	0.00147656	tRNA lysidine(34) synthetase TilS
697610AGL000613	-1.41357	0.000475486	0.00147656	motility associated factor glycosyltransferase family protein
697610AGL001379	1.16527	0.000508273	0.00157524	DNA polymerase III subunit delta
697610AGL000698	-1.83376	0.000620854	0.00187215	AAA domain
697610AGL001015	-1.26116	0.000695101	0.00207204	HAD-hyrolase-like
697610AGL000110	-1.30226	0.000899653	0.00261644	M23 family metallopeptidase
697610AGL000181	-1.61194	0.00118082	0.00334743	lipid A 1-phosphatase LpxE
697610AGL000816	-1.91201	0.00150076	0.00414167	RNase H
697610AGL001420	1.13424	0.00224245	0.00597732	Glutamine amidotransferase class-I
697610AGL000530	-4.63517	0.00248448	0.00653325	TlyA family RNA methyltransferase
697610AGL000601	-1.10931	0.0034251	0.00874184	CDP-diacylglycerol--glycerol-3-phosphate 3-phosphatidyltransferase
697610AGL001390	1.04741	0.0051261	0.0126492	RDD family protein
697610AGL000213	1.2025	0.00513756	0.0126575	restriction endonuclease
697610AGL001055	-1.66517	0.00721151	0.0173565	acetate kinase
697610AGL000225	-1.12	0.0097315	0.0226537	HNH endonuclease
697610AGL000628	-1.51817	0.0105264	0.0242869	glycosyltransferase family 9 protein
697610AGL000536	-1.45818	0.0126322	0.0283906	Restriction endonuclease
697610AGL000719	1.08716	0.0162579	0.0348831	AI-2E family transporter
697610AGL000886	-1.05776	0.021989	0.0454073	50S ribosome-binding GTPase

## Sheet: S4
Identification of differentially expressed genes between MNZ r0 and MNZ r50.
gene_id	log2FoldChange	pvalue	padj	gene_description
697610AGL000460	1.62904	6.39621e-18	9.19776e-15	Carbon-nitrogen hydrolase
697610AGL000949	-1.00703	2.50675e-14	1.20157e-11	Helicobacter outer membrane protein
697610AGL001236	1.23063	4.58099e-12	1.31749e-09	pyruvate ferredoxin oxidoreductase subunit beta
697610AGL000662	1.26592	2.30374e-11	5.5213e-09	type IV secretion system chaperone CagF
697610AGL001412	-1.04407	3.82163e-10	6.86939e-08	nicotinamide riboside transporter PnuC
697610AGL001514	1.05512	1.98483e-09	2.85419e-07	outer membrane protein assembly factor BamD
697610AGL001452	1.30503	3.94021e-09	4.72168e-07	Ribosomal protein L4
697610AGL001450	1.32322	1.36923e-08	1.51458e-06	Ribosomal Proteins L2
697610AGL001451	1.84196	1.94605e-08	1.99888e-06	50S ribosomal protein L23
697610AGL000109	-1.34292	2.93485e-08	2.81354e-06	M23 family metallopeptidase
697610AGL001447	1.12856	3.46915e-08	3.1179e-06	Ribosomal protein S3
697610AGL001343	1.56781	9.218e-08	6.97657e-06	F0F1 ATP synthase subunit C
697610AGL001095	-1.30263	1.06505e-07	7.65769e-06	Alanine racemase
697610AGL001133	-1.00283	2.26973e-07	1.41908e-05	cell division protein FtsZ
697610AGL000131	1.19519	2.61134e-07	1.56463e-05	peroxiredoxin
697610AGL000571	1.05414	2.84595e-07	1.63699e-05	acetate--CoA ligase
697610AGL001411	-1.1792	3.66804e-07	2.02871e-05	thiamine diphosphokinase
697610AGL001453	1.45004	1.72654e-06	8.00894e-05	Ribosomal protein L3
697610AGL000556	-1.01339	2.18802e-06	9.79483e-05	homoserine kinase
697610AGL000784	1.27461	3.85328e-06	0.000149757	Flavodoxin-like fold/NAD(P)H-dependent oxidoreductase
697610AGL000526	-1.14968	2.84368e-05	0.000801806	cell division protein FtsK
697610AGL001329	1.00907	3.62531e-05	0.000965407	Ribosomal protein L7
697610AGL000821	-1.04473	0.000112152	0.00237169	(Fe-S)-binding protein
697610AGL001448	1.11056	0.000154571	0.00306695	Ribosomal protein L22p
697610AGL000640	1.22613	0.000174666	0.00326997	Neuraminyllactose-binding hemagglutinin precursor (NLBH)
697610AGL000857	-1.08017	0.000273007	0.00467363	excinuclease ABC subunit A
697610AGL001518	-2.77095	0.000351763	0.00574812	DNA methylase
697610AGL000452	-1.02626	0.000519447	0.00778088	ATPase family associated with various cellular activities (AAA)
697610AGL001315	-1.08053	0.00101098	0.0124255	sugar transporter
697610AGL000423	-1.85633	0.00102795	0.012527	RIP metalloprotease RseP
697610AGL001201	1.32674	0.00127936	0.0148365	thioredoxin fold domain-containing protein
697610AGL000110	-2.14424	0.00136584	0.0153444	M23 family metallopeptidase
697610AGL001004	-1.38318	0.00152452	0.0166081	Type III restriction enzyme
697610AGL000530	-5.97514	0.00184376	0.0188038	TlyA family RNA methyltransferase
697610AGL000208	-1.26555	0.00237019	0.0219893	hydrogenase expression/formation protein HypE
697610AGL000610	-1.03396	0.00256258	0.0230312	N-6 DNA Methylase
697610AGL000536	-2.02331	0.00282072	0.0244349	Restriction endonuclease
697610AGL000518	-1.48177	0.00294024	0.0245818	C-5 cytosine-specific DNA methylase
697610AGL000372	-1.00537	0.00313941	0.0252205	putative lipopolysaccharide biosynthesis protein
697610AGL000279	-1.00146	0.00450944	0.0344924	motility associated factor glycosyltransferase family protein
697610AGL000133	-1.32737	0.00454412	0.0345738	penicillin-binding protein 2
697610AGL000923	1.06913	0.00481376	0.035138	molybdenum cofactor guanylyltransferase MobA
697610AGL000926	-2.17858	0.00640599	0.0430459	N-acetylmuramoyl-L-alanine amidase
697610AGL000459	-2.02489	0.00656438	0.0438826	bifunctional aminodeoxychorismate synthase component I/aminotransferase
697610AGL000402	-1.57251	0.00725312	0.0480645	c-type cytochrome

## Sheet: S5
GO and KEGG pathway enrichment analysis of ICDC15003-50-1.
Category	GOID	Description	pvalue	padj	geneID	Count	Up	Up_Gene_id	Down	Down_Gene_id
BP	GO:0006412	translation	0.00306785	0.136437	697610AGL001453/697610AGL001452/697610AGL001450/697610AGL000038/697610AGL001447/697610AGL001440/697610AGL001448/697610AGL000247/697610AGL000248	9	9	697610AGL001453/697610AGL001452/697610AGL001450/697610AGL000038/697610AGL001447/697610AGL001440/697610AGL001448/697610AGL000247/697610AGL000248	0
BP	GO:0043043	peptide biosynthetic process	0.00306785	0.136437	697610AGL001453/697610AGL001452/697610AGL001450/697610AGL000038/697610AGL001447/697610AGL001440/697610AGL001448/697610AGL000247/697610AGL000248	9	9	697610AGL001453/697610AGL001452/697610AGL001450/697610AGL000038/697610AGL001447/697610AGL001440/697610AGL001448/697610AGL000247/697610AGL000248	0
BP	GO:0006518	peptide metabolic process	0.00358172	0.136437	697610AGL001453/697610AGL001452/697610AGL001450/697610AGL000038/697610AGL001447/697610AGL001440/697610AGL001448/697610AGL000247/697610AGL000248	9	9	697610AGL001453/697610AGL001452/697610AGL001450/697610AGL000038/697610AGL001447/697610AGL001440/697610AGL001448/697610AGL000247/697610AGL000248	0
BP	GO:0044271	cellular nitrogen compound biosynthetic process	0.00438192	0.136437	697610AGL001453/697610AGL001452/697610AGL001450/697610AGL000038/697610AGL000573/697610AGL000150/697610AGL001447/697610AGL001440/697610AGL001448/697610AGL000403/697610AGL000592/697610AGL001411/697610AGL001294/697610AGL000247/697610AGL000248	15	11	697610AGL001453/697610AGL001452/697610AGL001450/697610AGL000038/697610AGL000150/697610AGL001447/697610AGL001440/697610AGL001448/697610AGL001294/697610AGL000247/697610AGL000248	4	697610AGL000573/697610AGL000403/697610AGL000592/697610AGL001411
BP	GO:0044267	cellular protein metabolic process	0.00454791	0.136437	697610AGL001453/697610AGL001452/697610AGL001450/697610AGL000038/697610AGL001447/697610AGL001440/697610AGL001448/697610AGL000247/697610AGL000248/697610AGL000953	10	10	697610AGL001453/697610AGL001452/697610AGL001450/697610AGL000038/697610AGL001447/697610AGL001440/697610AGL001448/697610AGL000247/697610AGL000248/697610AGL000953	0
BP	GO:0043604	amide biosynthetic process	0.00554458	0.138614	697610AGL001453/697610AGL001452/697610AGL001450/697610AGL000038/697610AGL001447/697610AGL001440/697610AGL001448/697610AGL000247/697610AGL000248	9	9	697610AGL001453/697610AGL001452/697610AGL001450/697610AGL000038/697610AGL001447/697610AGL001440/697610AGL001448/697610AGL000247/697610AGL000248	0
BP	GO:1901566	organonitrogen compound biosynthetic process	0.00780917	0.167339	697610AGL001453/697610AGL001452/697610AGL001450/697610AGL000038/697610AGL000150/697610AGL001447/697610AGL001440/697610AGL001448/697610AGL000403/697610AGL001411/697610AGL001294/697610AGL000247/697610AGL000248/697610AGL000953	14	12	697610AGL001453/697610AGL001452/697610AGL001450/697610AGL000038/697610AGL000150/697610AGL001447/697610AGL001440/697610AGL001448/697610AGL001294/697610AGL000247/697610AGL000248/697610AGL000953	2	697610AGL000403/697610AGL001411
BP	GO:0043603	cellular amide metabolic process	0.00937426	0.175767	697610AGL001453/697610AGL001452/697610AGL001450/697610AGL000038/697610AGL001447/697610AGL001440/697610AGL001448/697610AGL000247/697610AGL000248	9	9	697610AGL001453/697610AGL001452/697610AGL001450/697610AGL000038/697610AGL001447/697610AGL001440/697610AGL001448/697610AGL000247/697610AGL000248	0
BP	GO:1901576	organic substance biosynthetic process	0.0119162	0.186523	697610AGL001026/697610AGL001453/697610AGL001452/697610AGL001450/697610AGL000038/697610AGL000573/697610AGL000150/697610AGL001447/697610AGL001440/697610AGL001448/697610AGL000343/697610AGL000403/697610AGL000592/697610AGL001411/697610AGL001294/697610AGL000247/697610AGL000248/697610AGL000953	18	12	697610AGL001453/697610AGL001452/697610AGL001450/697610AGL000038/697610AGL000150/697610AGL001447/697610AGL001440/697610AGL001448/697610AGL001294/697610AGL000247/697610AGL000248/697610AGL000953	6	697610AGL001026/697610AGL000573/697610AGL000343/697610AGL000403/697610AGL000592/697610AGL001411
BP	GO:0009059	macromolecule biosynthetic process	0.0136783	0.186523	697610AGL001453/697610AGL001452/697610AGL001450/697610AGL000038/697610AGL000573/697610AGL001447/697610AGL001440/697610AGL001448/697610AGL000592/697610AGL000247/697610AGL000248	11	9	697610AGL001453/697610AGL001452/697610AGL001450/697610AGL000038/697610AGL001447/697610AGL001440/697610AGL001448/697610AGL000247/697610AGL000248	2	697610AGL000573/697610AGL000592
BP	GO:0034645	cellular macromolecule biosynthetic process	0.0136783	0.186523	697610AGL001453/697610AGL001452/697610AGL001450/697610AGL000038/697610AGL000573/697610AGL001447/697610AGL001440/697610AGL001448/697610AGL000592/697610AGL000247/697610AGL000248	11	9	697610AGL001453/697610AGL001452/697610AGL001450/697610AGL000038/697610AGL001447/697610AGL001440/697610AGL001448/697610AGL000247/697610AGL000248	2	697610AGL000573/697610AGL000592
BP	GO:0019538	protein metabolic process	0.0214584	0.258488	697610AGL001453/697610AGL001452/697610AGL001450/697610AGL000038/697610AGL001447/697610AGL001440/697610AGL001448/697610AGL000247/697610AGL000248/697610AGL000953	10	10	697610AGL001453/697610AGL001452/697610AGL001450/697610AGL000038/697610AGL001447/697610AGL001440/697610AGL001448/697610AGL000247/697610AGL000248/697610AGL000953	0
BP	GO:0051186	cofactor metabolic process	0.0243011	0.258488	697610AGL000386/697610AGL000150/697610AGL001411/697610AGL001294/697610AGL000953	5	4	697610AGL000386/697610AGL000150/697610AGL001294/697610AGL000953	1	697610AGL001411
BP	GO:0010467	gene expression	0.0255795	0.258488	697610AGL001453/697610AGL001452/697610AGL001450/697610AGL000038/697610AGL000573/697610AGL001447/697610AGL001440/697610AGL001448/697610AGL000592/697610AGL000247/697610AGL000248	11	9	697610AGL001453/697610AGL001452/697610AGL001450/697610AGL000038/697610AGL001447/697610AGL001440/697610AGL001448/697610AGL000247/697610AGL000248	2	697610AGL000573/697610AGL000592
BP	GO:0044249	cellular biosynthetic process	0.0258488	0.258488	697610AGL001026/697610AGL001453/697610AGL001452/697610AGL001450/697610AGL000038/697610AGL000573/697610AGL000150/697610AGL001447/697610AGL001440/697610AGL001448/697610AGL000403/697610AGL000592/697610AGL001411/697610AGL001294/697610AGL000247/697610AGL000248/697610AGL000953	17	12	697610AGL001453/697610AGL001452/697610AGL001450/697610AGL000038/697610AGL000150/697610AGL001447/697610AGL001440/697610AGL001448/697610AGL001294/697610AGL000247/697610AGL000248/697610AGL000953	5	697610AGL001026/697610AGL000573/697610AGL000403/697610AGL000592/697610AGL001411
BP	GO:0006810	transport	0.0388523	0.347087	697610AGL001031/697610AGL000838/697610AGL001303/697610AGL001412/697610AGL001304/697610AGL001463/697610AGL000839/697610AGL000600/697610AGL001473/697610AGL000043/697610AGL001315/697610AGL000069	12	6	697610AGL001031/697610AGL000838/697610AGL000839/697610AGL000600/697610AGL001473/697610AGL000069	6	697610AGL001303/697610AGL001412/697610AGL001304/697610AGL001463/697610AGL000043/697610AGL001315
BP	GO:0009058	biosynthetic process	0.0394492	0.347087	697610AGL001026/697610AGL001453/697610AGL001452/697610AGL001450/697610AGL000038/697610AGL000573/697610AGL000150/697610AGL001447/697610AGL001440/697610AGL001448/697610AGL000343/697610AGL000403/697610AGL000592/697610AGL001411/697610AGL001294/697610AGL000247/697610AGL000248/697610AGL000953	18	12	697610AGL001453/697610AGL001452/697610AGL001450/697610AGL000038/697610AGL000150/697610AGL001447/697610AGL001440/697610AGL001448/697610AGL001294/697610AGL000247/697610AGL000248/697610AGL000953	6	697610AGL001026/697610AGL000573/697610AGL000343/697610AGL000403/697610AGL000592/697610AGL001411
BP	GO:0051234	establishment of localization	0.0416505	0.347087	697610AGL001031/697610AGL000838/697610AGL001303/697610AGL001412/697610AGL001304/697610AGL001463/697610AGL000839/697610AGL000600/697610AGL001473/697610AGL000043/697610AGL001315/697610AGL000069	12	6	697610AGL001031/697610AGL000838/697610AGL000839/697610AGL000600/697610AGL001473/697610AGL000069	6	697610AGL001303/697610AGL001412/697610AGL001304/697610AGL001463/697610AGL000043/697610AGL001315
CC	GO:0005840	ribosome	0.000422115	0.00450087	697610AGL001453/697610AGL001452/697610AGL001450/697610AGL000038/697610AGL001447/697610AGL001440/697610AGL001448/697610AGL000247/697610AGL000248/697610AGL000462	10	10	697610AGL001453/697610AGL001452/697610AGL001450/697610AGL000038/697610AGL001447/697610AGL001440/697610AGL001448/697610AGL000247/697610AGL000248/697610AGL000462	0
CC	GO:1990904	ribonucleoprotein complex	0.000623629	0.00450087	697610AGL001453/697610AGL001452/697610AGL001450/697610AGL000038/697610AGL001447/697610AGL001440/697610AGL001448/697610AGL000247/697610AGL000248/697610AGL000462	10	10	697610AGL001453/697610AGL001452/697610AGL001450/697610AGL000038/697610AGL001447/697610AGL001440/697610AGL001448/697610AGL000247/697610AGL000248/697610AGL000462	0
CC	GO:0043229	intracellular organelle	0.000900174	0.00450087	697610AGL001453/697610AGL001452/697610AGL001450/697610AGL000038/697610AGL001447/697610AGL001440/697610AGL001448/697610AGL000247/697610AGL000248/697610AGL000462	10	10	697610AGL001453/697610AGL001452/697610AGL001450/697610AGL000038/697610AGL001447/697610AGL001440/697610AGL001448/697610AGL000247/697610AGL000248/697610AGL000462	0
CC	GO:0043232	intracellular non-membrane-bounded organelle	0.000900174	0.00450087	697610AGL001453/697610AGL001452/697610AGL001450/697610AGL000038/697610AGL001447/697610AGL001440/697610AGL001448/697610AGL000247/697610AGL000248/697610AGL000462	10	10	697610AGL001453/697610AGL001452/697610AGL001450/697610AGL000038/697610AGL001447/697610AGL001440/697610AGL001448/697610AGL000247/697610AGL000248/697610AGL000462	0
CC	GO:0044444	cytoplasmic part	0.00127216	0.00508863	697610AGL001453/697610AGL001452/697610AGL001450/697610AGL000038/697610AGL001447/697610AGL001440/697610AGL001448/697610AGL000247/697610AGL000248/697610AGL000462	10	10	697610AGL001453/697610AGL001452/697610AGL001450/697610AGL000038/697610AGL001447/697610AGL001440/697610AGL001448/697610AGL000247/697610AGL000248/697610AGL000462	0
CC	GO:0043226	organelle	0.00504253	0.0144072	697610AGL001453/697610AGL001452/697610AGL001450/697610AGL000038/697610AGL001447/697610AGL001440/697610AGL001448/697610AGL000247/697610AGL000248/697610AGL000462/697610AGL000907	11	11	697610AGL001453/697610AGL001452/697610AGL001450/697610AGL000038/697610AGL001447/697610AGL001440/697610AGL001448/697610AGL000247/697610AGL000248/697610AGL000462/697610AGL000907	0
CC	GO:0043228	non-membrane-bounded organelle	0.00504253	0.0144072	697610AGL001453/697610AGL001452/697610AGL001450/697610AGL000038/697610AGL001447/697610AGL001440/697610AGL001448/697610AGL000247/697610AGL000248/697610AGL000462/697610AGL000907	11	11	697610AGL001453/697610AGL001452/697610AGL001450/697610AGL000038/697610AGL001447/697610AGL001440/697610AGL001448/697610AGL000247/697610AGL000248/697610AGL000462/697610AGL000907	0
CC	GO:0032991	protein-containing complex	0.0121798	0.0304494	697610AGL001453/697610AGL001452/697610AGL001450/697610AGL000038/697610AGL001447/697610AGL001440/697610AGL001448/697610AGL000247/697610AGL000248/697610AGL000462/697610AGL000069	11	11	697610AGL001453/697610AGL001452/697610AGL001450/697610AGL000038/697610AGL001447/697610AGL001440/697610AGL001448/697610AGL000247/697610AGL000248/697610AGL000462/697610AGL000069	0
CC	GO:0005737	cytoplasm	0.0414961	0.0922136	697610AGL001453/697610AGL001452/697610AGL001450/697610AGL000038/697610AGL000150/697610AGL001447/697610AGL001440/697610AGL001448/697610AGL000247/697610AGL000248/697610AGL000462	11	11	697610AGL001453/697610AGL001452/697610AGL001450/697610AGL000038/697610AGL000150/697610AGL001447/697610AGL001440/697610AGL001448/697610AGL000247/697610AGL000248/697610AGL000462	0
MF	GO:0003735	structural constituent of ribosome	6.69523e-06	0.000408409	697610AGL001453/697610AGL001452/697610AGL001450/697610AGL000038/697610AGL001447/697610AGL001440/697610AGL001448/697610AGL000247/697610AGL000248	9	9	697610AGL001453/697610AGL001452/697610AGL001450/697610AGL000038/697610AGL001447/697610AGL001440/697610AGL001448/697610AGL000247/697610AGL000248	0
MF	GO:0005198	structural molecule activity	3.99754e-05	0.00121925	697610AGL001453/697610AGL001452/697610AGL001450/697610AGL000038/697610AGL001447/697610AGL001440/697610AGL001448/697610AGL000247/697610AGL000248	9	9	697610AGL001453/697610AGL001452/697610AGL001450/697610AGL000038/697610AGL001447/697610AGL001440/697610AGL001448/697610AGL000247/697610AGL000248	0
MF	GO:0016810	hydrolase activity, acting on carbon-nitrogen (but not peptide) bonds	0.0487953	0.987324	697610AGL000460/697610AGL000476/697610AGL001369	3	2	697610AGL000460/697610AGL001369	1	697610AGL000476
ICDC10053-50-1 MTZ R vs MTZ S KEGGenrich
KEGGID	Description	pvalue	padj	geneID	Count	Up	Up_Gene_names	Down
hpy03010	Ribosome	6.95005e-10	2.15451e-08	697610AGL001453/697610AGL001452/697610AGL001450/697610AGL000038/697610AGL001449/697610AGL001454/697610AGL001447/697610AGL001440/697610AGL001451/697610AGL001444/697610AGL001441/697610AGL001448/697610AGL001445/697610AGL001442/697610AGL000247/697610AGL000248/697610AGL000462/697610AGL000463	18	18	697610AGL001453/697610AGL001452/697610AGL001450/697610AGL000038/697610AGL001449/697610AGL001454/697610AGL001447/697610AGL001440/697610AGL001451/697610AGL001444/697610AGL001441/697610AGL001448/697610AGL001445/697610AGL001442/697610AGL000247/697610AGL000248/697610AGL000462/697610AGL000463	0

## Sheet: S6
GO pathway enrichment analysis of ICDC15003-50-2.
Category	GOID	Description	pvalue	padj	geneID	Count	Up	Up_Gene_id	Down	Down_Gene_id
BP	GO:0051186	cofactor metabolic process	0.00568918	0.79136	697610AGL000150/697610AGL000151/697610AGL001478/697610AGL001411/697610AGL000558/697610AGL000386/697610AGL000320	7	7	697610AGL000150/697610AGL000151/697610AGL001478/697610AGL001411/697610AGL000558/697610AGL000386/697610AGL000320	0
BP	GO:0051188	cofactor biosynthetic process	0.012189	0.79136	697610AGL000150/697610AGL000151/697610AGL001478/697610AGL001411/697610AGL000558/697610AGL000320	6	6	697610AGL000150/697610AGL000151/697610AGL001478/697610AGL001411/697610AGL000558/697610AGL000320	0
MF	GO:0016491	oxidoreductase activity	0.0408443	0.914878	697610AGL000151/697610AGL000796/697610AGL000797/697610AGL000389/697610AGL000744/697610AGL000832/697610AGL000131/697610AGL001187/697610AGL001401/697610AGL001233/697610AGL001402	11	4	697610AGL000151/697610AGL000389/697610AGL000832/697610AGL001233	7	697610AGL000796/697610AGL000797/697610AGL000744/697610AGL000131/697610AGL001187/697610AGL001401/697610AGL001402
MF	GO:0003735	structural constituent of ribosome	0.0446332	0.914878	697610AGL001447/697610AGL001448/697610AGL001450/697610AGL000290/697610AGL001430	5	0		5	697610AGL001447/697610AGL001448/697610AGL001450/697610AGL000290/697610AGL001430
KEGG pathway enrichment analysis of ICDC15003-50-2.
KEGGID	Description	pvalue	padj	geneID	keggID	Count	Up	Up_Gene_names	Down	Down_Gene_names
hpy00190	Oxidative phosphorylation	0.000257884	0.0123784	697610AGL001404/697610AGL001401/697610AGL001399/697610AGL000105/697610AGL000355/697610AGL001259/697610AGL001397/697610AGL001398/697610AGL001400/697610AGL001258/697610AGL001402/697610AGL001343/697610AGL001405/697610AGL001403/697610AGL001257/697610AGL001260	hpy:HP_1272/hpy:HP_1269/hpy:HP_1267/hpy:HP_1539/hpy:HP_0191/hpy:HP_1134/hpy:HP_1265/hpy:HP_1266/hpy:HP_1268/hpy:HP_1133/hpy:HP_1270/hpy:HP_1212/hpy:HP_1273/hpy:HP_1271/hpy:HP_1132/hpy:HP_1135	16	0		16	697610AGL001404/697610AGL001401/697610AGL001399/697610AGL000105/697610AGL000355/697610AGL001259/697610AGL001397/697610AGL001398/697610AGL001400/697610AGL001258/697610AGL001402/697610AGL001343/697610AGL001405/697610AGL001403/697610AGL001257/697610AGL001260
hpy02010	ABC transporters	0.0124179	0.296362	697610AGL000132/697610AGL000465/697610AGL000466/697610AGL000867/697610AGL000417/697610AGL000467/697610AGL000416	hpy:HP_1564/hpy:HP_0299/hpy:HP_0300/hpy:HP_0715/hpy:HP_0251/hpy:HP_0301/hpy:HP_0250	7	1	697610AGL000867	6	697610AGL000132/697610AGL000465/697610AGL000466/697610AGL000417/697610AGL000467/697610AGL000416
hpy00330	Arginine and proline metabolism	0.015198	0.296362	697610AGL000460/697610AGL000826/697610AGL000991/697610AGL000089	hpy:HP_0294/hpy:HP_0672/hpy:HP_0832/hpy:HP_1399	4	4	697610AGL000460/697610AGL000826/697610AGL000991/697610AGL000089	0

## Sheet: S7
GO pathway enrichment analysis between MNZ r0 and MNZ r50.
Category	GOID	Description	pvalue	padj	geneID	Count	Up	Up_Gene_id	Down	Down_Gene_id
BP	GO:0006412	translation	0.00469992	0.0947168	697610AGL001452/697610AGL001450/697610AGL001447/697610AGL001453/697610AGL001329/697610AGL001448	6	6	697610AGL001452/697610AGL001450/697610AGL001447/697610AGL001453/697610AGL001329/697610AGL001448	0
BP	GO:0043043	peptide biosynthetic process	0.00469992	0.0947168	697610AGL001452/697610AGL001450/697610AGL001447/697610AGL001453/697610AGL001329/697610AGL001448	6	6	697610AGL001452/697610AGL001450/697610AGL001447/697610AGL001453/697610AGL001329/697610AGL001448	0
BP	GO:0006518	peptide metabolic process	0.00524423	0.0947168	697610AGL001452/697610AGL001450/697610AGL001447/697610AGL001453/697610AGL001329/697610AGL001448	6	6	697610AGL001452/697610AGL001450/697610AGL001447/697610AGL001453/697610AGL001329/697610AGL001448	0
BP	GO:0043604	amide biosynthetic process	0.00716186	0.0947168	697610AGL001452/697610AGL001450/697610AGL001447/697610AGL001453/697610AGL001329/697610AGL001448	6	6	697610AGL001452/697610AGL001450/697610AGL001447/697610AGL001453/697610AGL001329/697610AGL001448	0
BP	GO:0043170	macromolecule metabolic process	0.010109	0.0947168	697610AGL001452/697610AGL001450/697610AGL001447/697610AGL001453/697610AGL001329/697610AGL001448/697610AGL001518/697610AGL000423/697610AGL001004/697610AGL000610/697610AGL000536/697610AGL000926	12	6	697610AGL001452/697610AGL001450/697610AGL001447/697610AGL001453/697610AGL001329/697610AGL001448	6	697610AGL001518/697610AGL000423/697610AGL001004/697610AGL000610/697610AGL000536/697610AGL000926
BP	GO:0044260	cellular macromolecule metabolic process	0.0103735	0.0947168	697610AGL001452/697610AGL001450/697610AGL001447/697610AGL001453/697610AGL001329/697610AGL001448/697610AGL001518/697610AGL001004/697610AGL000610/697610AGL000536	10	6	697610AGL001452/697610AGL001450/697610AGL001447/697610AGL001453/697610AGL001329/697610AGL001448	4	697610AGL001518/697610AGL001004/697610AGL000610/697610AGL000536
BP	GO:0043603	cellular amide metabolic process	0.0104703	0.0947168	697610AGL001452/697610AGL001450/697610AGL001447/697610AGL001453/697610AGL001329/697610AGL001448	6	6	697610AGL001452/697610AGL001450/697610AGL001447/697610AGL001453/697610AGL001329/697610AGL001448	0
BP	GO:0019538	protein metabolic process	0.0109817	0.0947168	697610AGL001452/697610AGL001450/697610AGL001447/697610AGL001453/697610AGL001329/697610AGL001448/697610AGL000423	7	6	697610AGL001452/697610AGL001450/697610AGL001447/697610AGL001453/697610AGL001329/697610AGL001448	1	697610AGL000423
BP	GO:0044267	cellular protein metabolic process	0.0147748	0.113273	697610AGL001452/697610AGL001450/697610AGL001447/697610AGL001453/697610AGL001329/697610AGL001448	6	6	697610AGL001452/697610AGL001450/697610AGL001447/697610AGL001453/697610AGL001329/697610AGL001448	0
BP	GO:0006304	DNA modification	0.0175243	0.120918	697610AGL001518/697610AGL001004/697610AGL000610/697610AGL000536	4	0		4	697610AGL001518/697610AGL001004/697610AGL000610/697610AGL000536
BP	GO:0032259	methylation	0.0325208	0.203994	697610AGL001518/697610AGL000530/697610AGL000610	3	0		3	697610AGL001518/697610AGL000530/697610AGL000610
BP	GO:0006807	nitrogen compound metabolic process	0.041557	0.238953	697610AGL000460/697610AGL001452/697610AGL001450/697610AGL001447/697610AGL001411/697610AGL001453/697610AGL001329/697610AGL001448/697610AGL001518/697610AGL000423/697610AGL001004/697610AGL000610/697610AGL000536/697610AGL000926	14	7	697610AGL000460/697610AGL001452/697610AGL001450/697610AGL001447/697610AGL001453/697610AGL001329/697610AGL001448	7	697610AGL001411/697610AGL001518/697610AGL000423/697610AGL001004/697610AGL000610/697610AGL000536/697610AGL000926
CC	GO:0005840	ribosome	0.000233821	0.001695	697610AGL001452/697610AGL001450/697610AGL001447/697610AGL001453/697610AGL001329/697610AGL001448	6	6	697610AGL001452/697610AGL001450/697610AGL001447/697610AGL001453/697610AGL001329/697610AGL001448	0
CC	GO:1990904	ribonucleoprotein complex	0.000298479	0.001695	697610AGL001452/697610AGL001450/697610AGL001447/697610AGL001453/697610AGL001329/697610AGL001448	6	6	697610AGL001452/697610AGL001450/697610AGL001447/697610AGL001453/697610AGL001329/697610AGL001448	0
CC	GO:0043229	intracellular organelle	0.000376801	0.001695	697610AGL001452/697610AGL001450/697610AGL001447/697610AGL001453/697610AGL001329/697610AGL001448	6	6	697610AGL001452/697610AGL001450/697610AGL001447/697610AGL001453/697610AGL001329/697610AGL001448	0
CC	GO:0043232	intracellular non-membrane-bounded organelle	0.000376801	0.001695	697610AGL001452/697610AGL001450/697610AGL001447/697610AGL001453/697610AGL001329/697610AGL001448	6	6	697610AGL001452/697610AGL001450/697610AGL001447/697610AGL001453/697610AGL001329/697610AGL001448	0
CC	GO:0044444	cytoplasmic part	0.000470834	0.001695	697610AGL001452/697610AGL001450/697610AGL001447/697610AGL001453/697610AGL001329/697610AGL001448	6	6	697610AGL001452/697610AGL001450/697610AGL001447/697610AGL001453/697610AGL001329/697610AGL001448	0
CC	GO:0032991	protein-containing complex	0.000594381	0.00178314	697610AGL001452/697610AGL001450/697610AGL001447/697610AGL001343/697610AGL001453/697610AGL001329/697610AGL001448	7	7	697610AGL001452/697610AGL001450/697610AGL001447/697610AGL001343/697610AGL001453/697610AGL001329/697610AGL001448	0
CC	GO:0043226	organelle	0.00285855	0.00643174	697610AGL001452/697610AGL001450/697610AGL001447/697610AGL001453/697610AGL001329/697610AGL001448	6	6	697610AGL001452/697610AGL001450/697610AGL001447/697610AGL001453/697610AGL001329/697610AGL001448	0
CC	GO:0043228	non-membrane-bounded organelle	0.00285855	0.00643174	697610AGL001452/697610AGL001450/697610AGL001447/697610AGL001453/697610AGL001329/697610AGL001448	6	6	697610AGL001452/697610AGL001450/697610AGL001447/697610AGL001453/697610AGL001329/697610AGL001448	0
CC	GO:0005737	cytoplasm	0.0116594	0.0233188	697610AGL001452/697610AGL001450/697610AGL001447/697610AGL001453/697610AGL001329/697610AGL001448	6	6	697610AGL001452/697610AGL001450/697610AGL001447/697610AGL001453/697610AGL001329/697610AGL001448	0
CC	GO:0044424	intracellular part	0.0305599	0.0550079	697610AGL001452/697610AGL001450/697610AGL001447/697610AGL001453/697610AGL001329/697610AGL001448	6	6	697610AGL001452/697610AGL001450/697610AGL001447/697610AGL001453/697610AGL001329/697610AGL001448	0
CC	GO:0005622	intracellular	0.0492652	0.077747	697610AGL001452/697610AGL001450/697610AGL001447/697610AGL001453/697610AGL001329/697610AGL001448	6	6	697610AGL001452/697610AGL001450/697610AGL001447/697610AGL001453/697610AGL001329/697610AGL001448	0
MF	GO:0003735	structural constituent of ribosome	0.000441195	0.0251481	697610AGL001452/697610AGL001450/697610AGL001447/697610AGL001453/697610AGL001329/697610AGL001448	6	6	697610AGL001452/697610AGL001450/697610AGL001447/697610AGL001453/697610AGL001329/697610AGL001448	0
MF	GO:0005198	structural molecule activity	0.00132043	0.0376324	697610AGL001452/697610AGL001450/697610AGL001447/697610AGL001453/697610AGL001329/697610AGL001448	6	6	697610AGL001452/697610AGL001450/697610AGL001447/697610AGL001453/697610AGL001329/697610AGL001448	0
KEGG pathway enrichment analysis between MNZ r0 and MNZ r50.
KEGGID	Description	pvalue	padj	geneID	keggID	Count	Up	Up_Gene_names	Down	Down_Gene_names
hpy03010	Ribosome	0.000325997	0.00684594	697610AGL001452/697610AGL001450/697610AGL001451/697610AGL001447/697610AGL001453/697610AGL000239/697610AGL001329/697610AGL001448	hpy:HP_1318/hpy:HP_1316/hpy:HP_1317/hpy:HP_1313/hpy:HP_1319/hpy:HP_0076/hpy:HP_1199/hpy:HP_1314	8	8	697610AGL001452/697610AGL001450/697610AGL001451/697610AGL001447/697610AGL001453/697610AGL000239/697610AGL001329/697610AGL001448	0
